# Supplementary material for: Reactivity of canonical bacterial cytochrome c peroxidases: insights into the electronic structure of compound I
Source: Royal Society of Chemistry journal article supplement (doi:10.1039/d4sc07339h), 2025-01-01
Supplement: d4sc07339h1.pdf [file d4sc07339h1.pdf]

## Supplementary Materials

### Reactivity of canonical bacterial cytochrome c peroxidases: insights into the electronic structure of Compound I

Patrick Hewitt, Michael P. Hendrich, and Sean J. Elliott

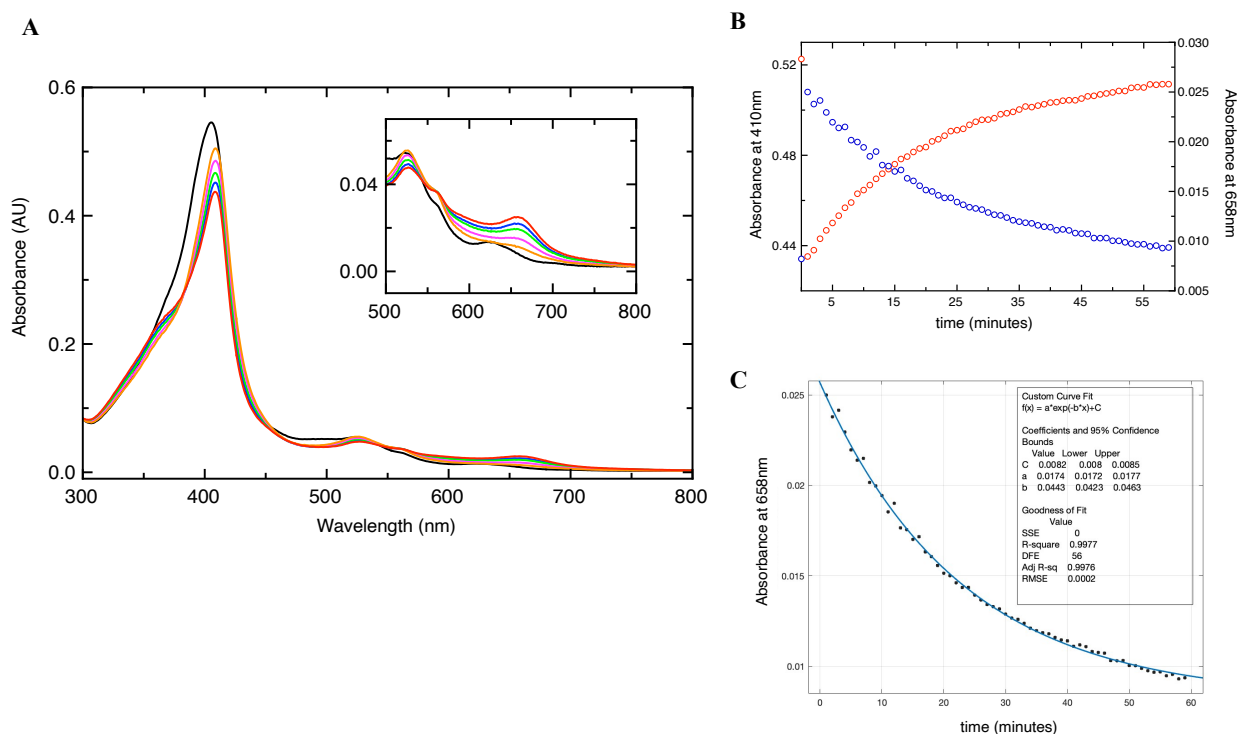

**Figure S1:** Decay of *Ne* bCcp compound 1 in the absence of reducing substrates at pH 7.5. A) spectra of selected timepoints: Diferric *Ne* bCcp (black), 1 minute post  $\text{H}_2\text{O}_2$  addition (red), 5 minutes (blue), 10 minutes (green), 30 minutes (pink), and 40 minutes (orange). B)  $A_{410 \text{ nm}}$  (red circles) and  $A_{658 \text{ nm}}$  (blue circles) collected over 60 minutes ( $\text{H}_2\text{O}_2$  was added after timepoint 0). C) exponential fit of the decrease in absorbance at 658nm vs time. The decay rate of the 658nm absorbance is  $0.0443 \text{ min}^{-1}$  at pH 7.5

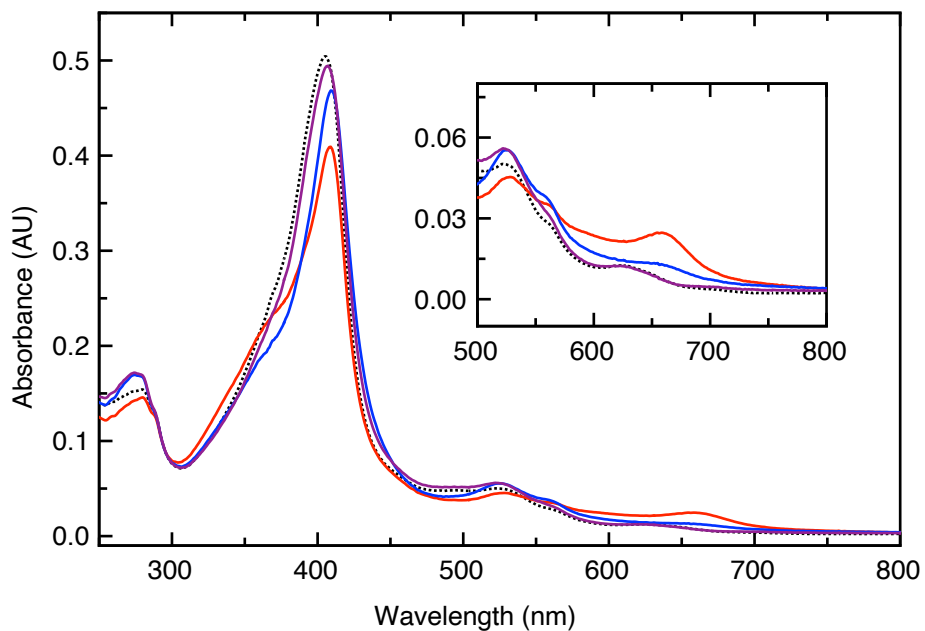

**Figure S2:** Addition of guaiacol to *Ne* bCcP compound 1. Starting material of the diferric enzyme shown as the black dotted line. 1 equivalent of H<sub>2</sub>O<sub>2</sub> was added to form compound 1 (red), which was quickly converted into compound 2 upon the addition of 2.5 equivalents guaiacol (blue). The spectra taken 7 minutes post-guaiacol addition (purple) resembles that of diferric *Ne* bCcP.

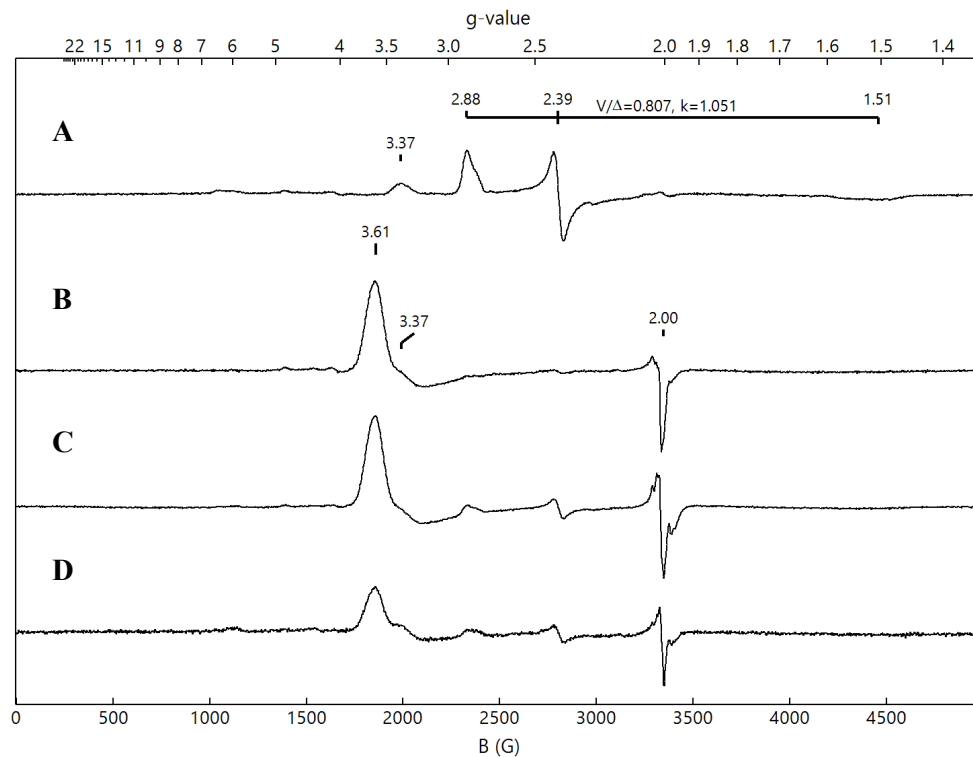

**Figure S3:** Decay of the  $g=3.6$ , 2 species over 30 minutes. Three separate diferric *Ne* bCcP samples were reacted with 5 equivalents peroxide and frozen at varying timepoints. Spectra of starting material were scaled to match LP heme signal intensity, and respective scale factors were used to scale the peroxide-reacted spectra of each sample. A) Diferric *Ne* bCcP. B) 2 minutes post- $\text{H}_2\text{O}_2$  addition. C) 4 minutes post- $\text{H}_2\text{O}_2$  addition. D) 30 minutes post- $\text{H}_2\text{O}_2$  addition. All spectra shown were collected at 0.2mW between 11-12K.

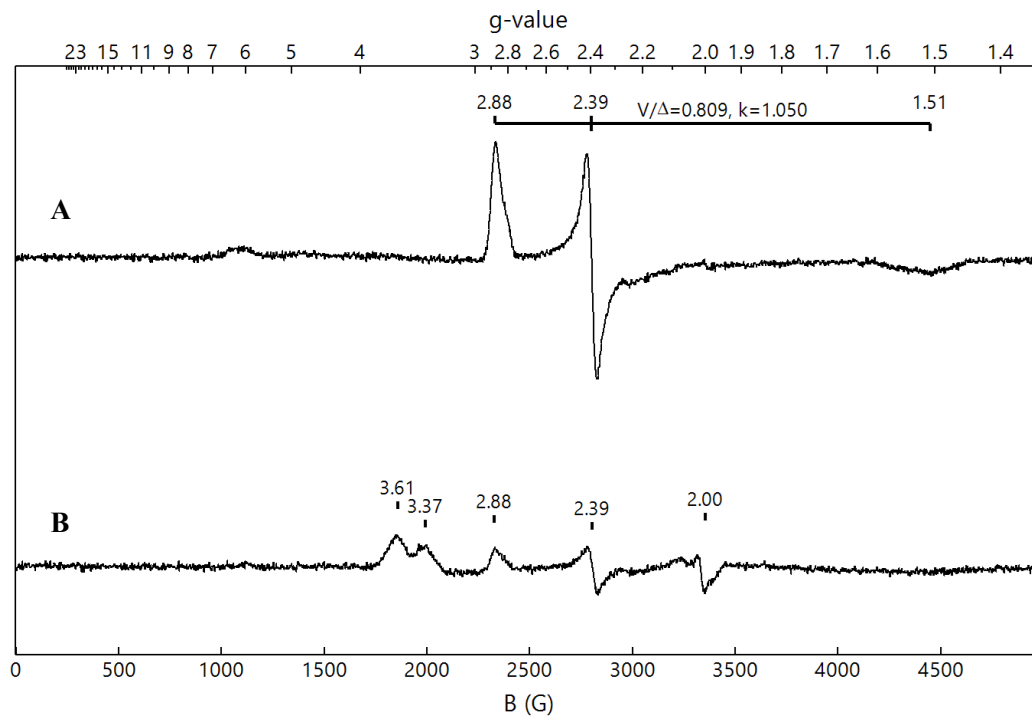

**Figure S4:** EPR spectra of  $\text{H}_2\text{O}_2$  addition to semi-reduced *Ne* bCcP with a 5-minute incubation time at pH 7.5. A) Semi-reduced *Ne* bCcP. B) sample from A plus 5 equivalents peroxide, frozen ~5 minutes after peroxide addition. Both spectra were measured with 0.2mW power at 11.6K and 11.9K respectively.

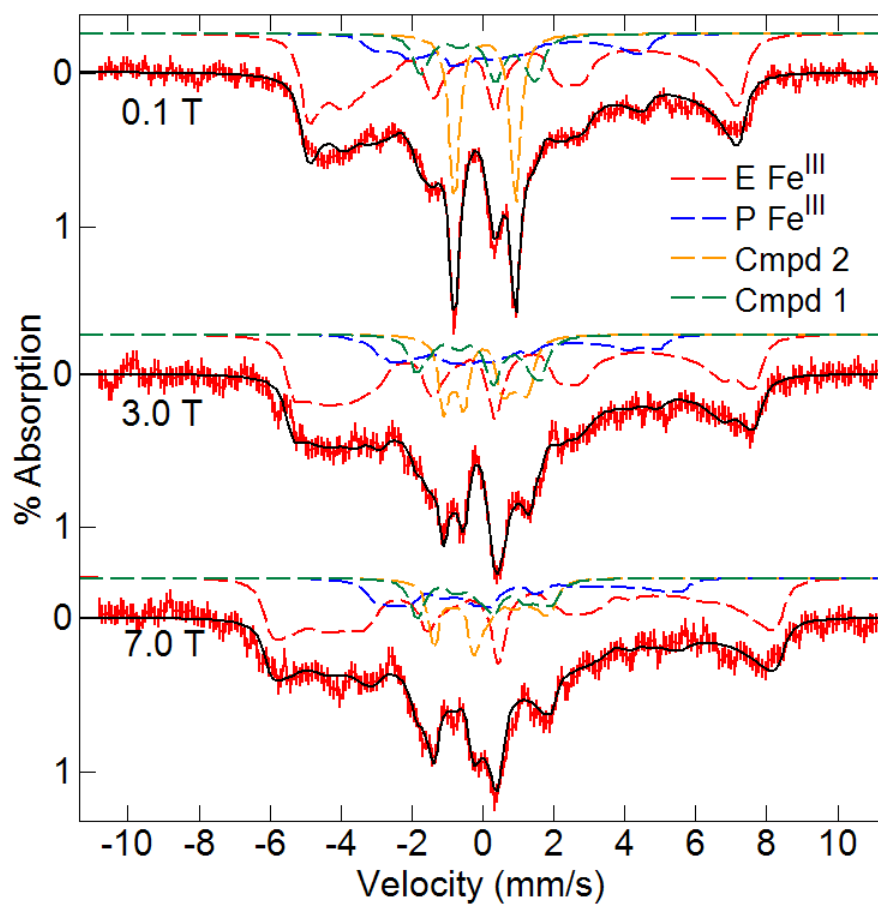

**Figure S5:** Mössbauer spectra (red vertical bars) of oxidized *Ne* bCcP at pH 7.5 reacted with H<sub>2</sub>O<sub>2</sub> recorded at 4 K in the magnetic fields listed.

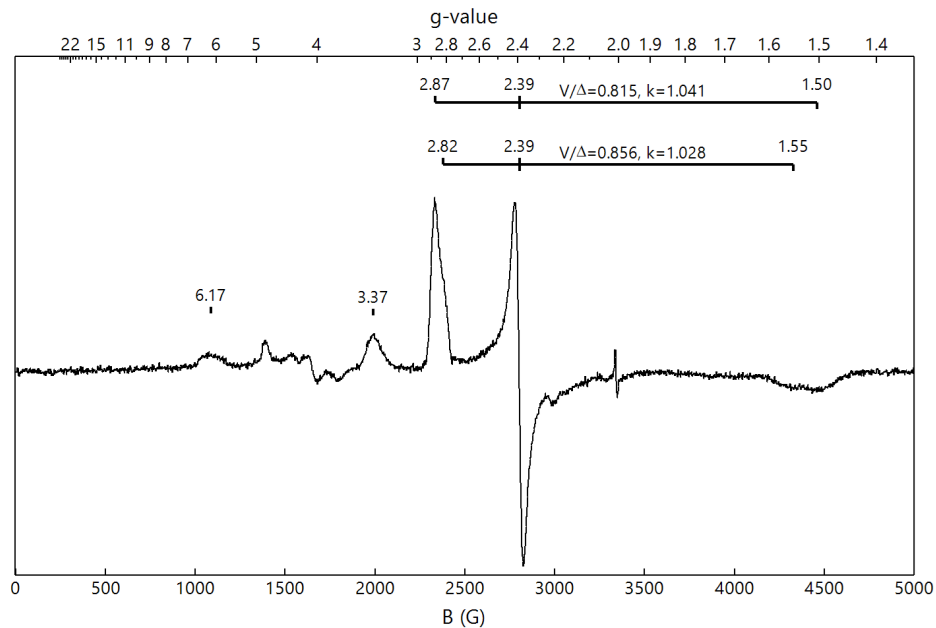

**Figure S6:** EPR Spectra of *Ne* bCcP at pH 8.6. An EPR sample of *Ne* bCcP was prepared in 20mM TAPS, 10% w/v glycerol, pH 8.6. Spectra shown was measured at 11K, 0.2mW power.

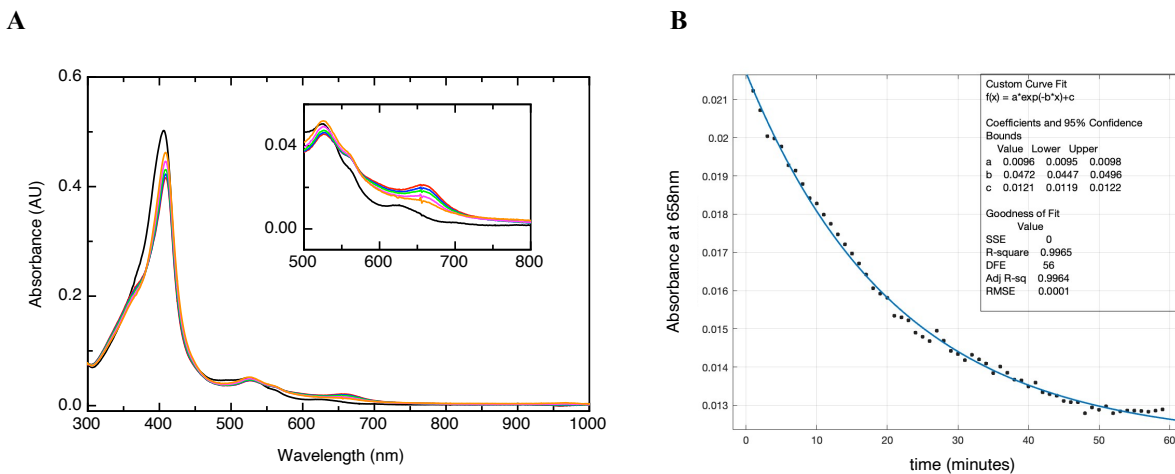

**Figure S7:** Decay of compound 1 at pH 8.6. A) Diferric *Ne* bCcP (black). 2 equivalents  $H_2O_2$  added to form compound 1. The resulting decay of compound 1 is shown at 1 minute (red), 5 minutes (blue), 10 minutes (green), 20 minutes (pink), and 40 minutes (orange). B) Exponential fit of decrease of 658nm absorbance vs time. The decay rate of the 658nm absorbance is  $0.0472 \text{ min}^{-1}$  at pH 8.6

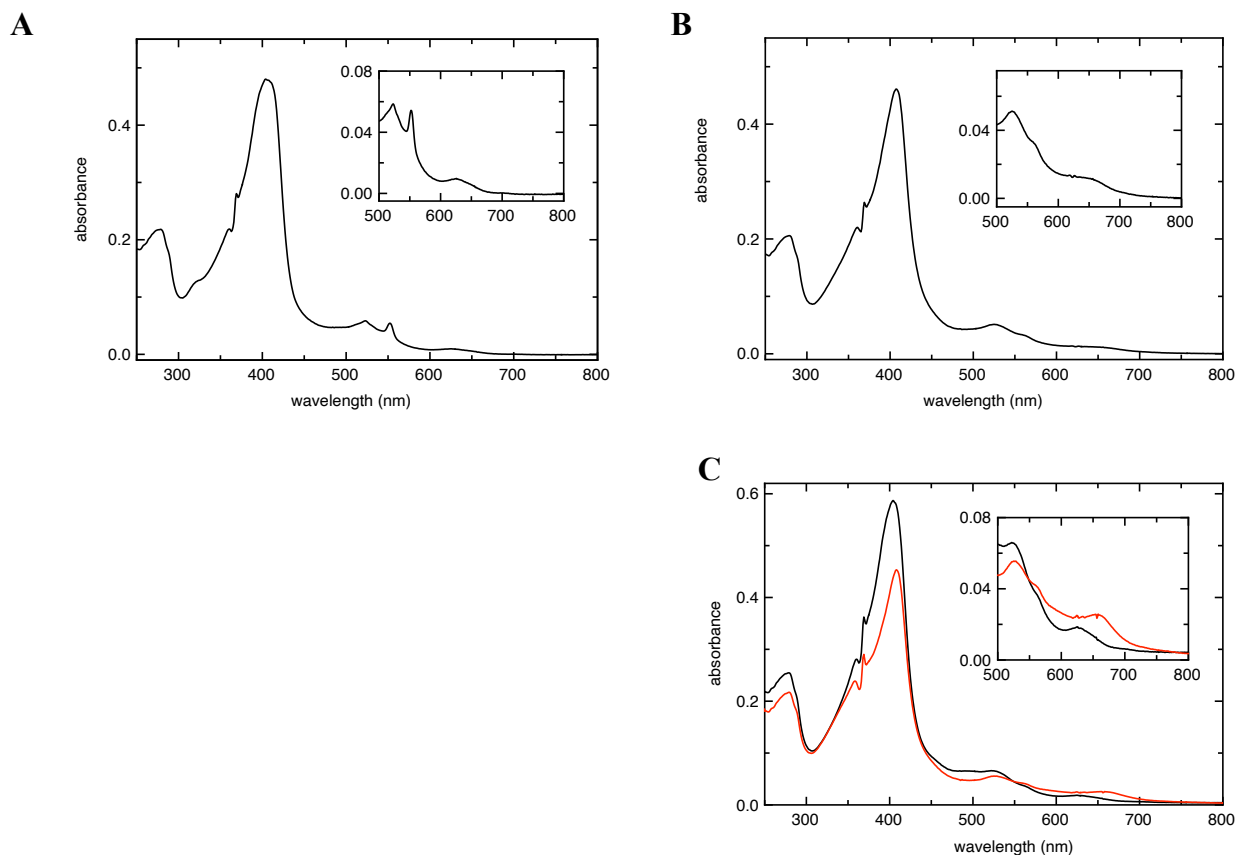

**Figure S8:** Representative UV-Vis spectra of Mössbauer samples. Before final freezing of the Mössbauer samples, a small a volume of the sample was taken from the cup and diluted in buffer for UV-Vis measurement. **A)** The *Ne* bCcP sample with a fraction of the E heme reduced (Mössbauer spectra in figure 4 in main text). **B)** the low compound 1 yield pH 7.5 sample, where 20 equivalents of H<sub>2</sub>O<sub>2</sub> were added to *Ne* bCcP that had a fraction of the E heme reduced. Samples in A and B were prepared side by side from the same stock of concentrated protein. **C)** The high yield compound 1 sample at pH 8.6 (Mössbauer spectra in figure 5 in main text). Spectra were taken from this sample before (black) and after (red) addition of 15 equivalents of H<sub>2</sub>O<sub>2</sub>.
